# Supplementary material
Source: Springer Nature journal article supplement (http://www.springermedizin.de/resource/supplementary/13046_2010_443_MOESM3_ESM.pdf/9662240)

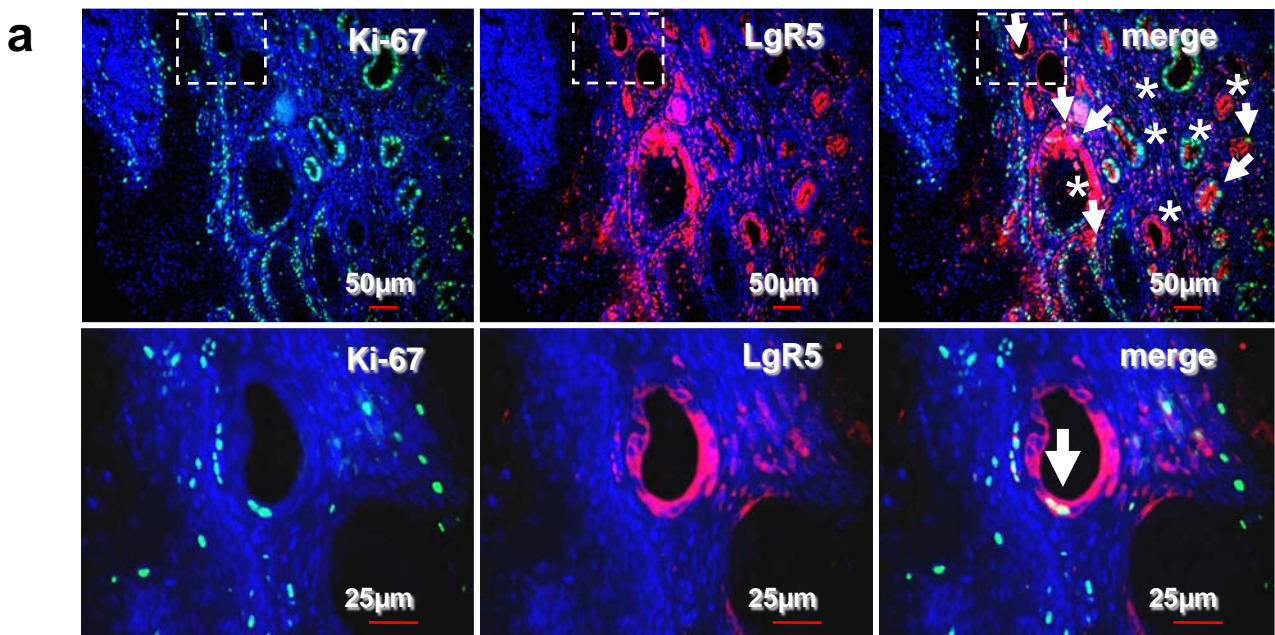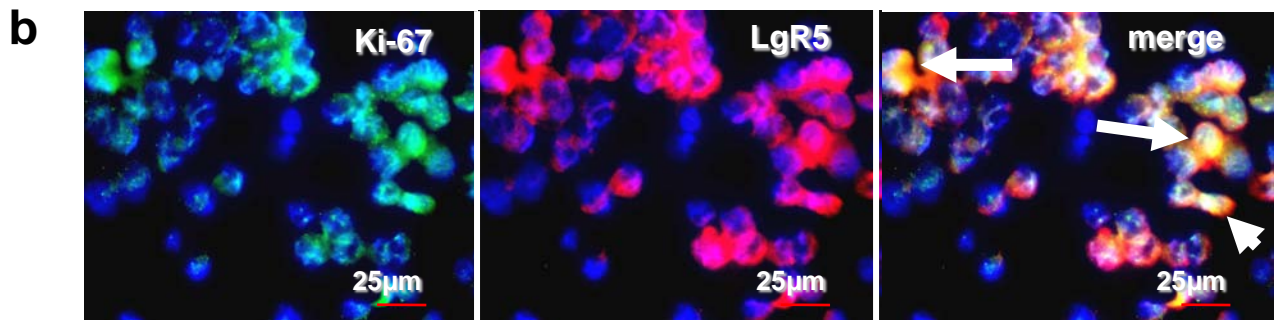

Supplement: MOESM3 [file 9662240]
